# Supplementary material for: Characterization and corrosion resistance of ultra-high molecular weight polyethylene composite coatings reinforced with tungsten carbide particles in hydrochloric acid medium
Source: publisher site journal article supplement (doi:10.1515/polyeng-2018-0397), 2019-09-24
Supplement: Supplementary file 1 [file polyeng-2018-0397_suppl.docx]

**Supplementary material**

**Characterization and corrosion resistance of UHMWPE composite coatings reinforced with tungsten carbide particles in hydrochloric acid medium**

Akeem Yusuf Adesina, M. Faizan Khan, Muhammad Umar Azam, Mohammed Abdul Samad and Ahmad A. Sorour

DOI 10.1515/polyeng-2018-0397

**Supplementary Figure 1:** Equivalent circuits used for fitting EIS spectra of (a) bare steel and (b) coated samples.
